# Supplementary material for: CoMeta: Classification of Metagenomes Using k-mers
Source: PubMed Central journal article supplement (PMC4401624; doi:10.1371/journal.pone.0121453), 2015-04-17
Supplement: pone.0121453.s001.pdf [file pone.0121453.s001.pdf]

# Supplementary Material

## CoMeta: Classification of metagenomes using $k$ -mer

Jolanta Kawulok\*, Sebastian Deorowicz

Institute of Informatics, Silesian University of Technology, Gliwice, Poland

\* E-mail: jolanta.kawulok@polsl.pl

## 1 Experiment Two

This section includes the presentation of the certain additional results of the classification 454 reads using CoMeta *allDb* and LMAT algorithms.

### 1.1 CoMeta *allDb*

The *allDb* database was constructed using all reference sequences from the NCBI genome database from 2012, which was mentioned in the main paper. The program with this database was evaluated for *FACS 269 bp*, *Reduced FACS 269 bp*, *MetaPhyler 300 bp*, *CARMA 265 bp*, and *PhyloPythia 961 bp* metagenomic datasets (from the 454 sequencing). *PhyloPythia 961 bp* was classified into the genus, whilst the other datasets into the phyla rank. The classification results were calculated in such a way that if a read was classified to several groups, then it was assigned to all of them. Hence, in some cases, the sum of TP, FP, and NC was higher than the number of all reads in the dataset.

Tables 1 to 5 show the classification results using different parameters and metagenomic sets. For each  $k$ -mer length, classification was performed with two options: 1) without taking into account the *mismatch* files (the upper row); 2) with taking into account the *mismatch* files—the reads accumulated the alignment points more than 0 and less than 30% of its length (the bottom row). In most cases, with the *mismatch* files included, the number of true positives increases, and thus the sensitivity increases as well. However, this is achieved at the expense of the accuracy—the number of false classified read increases, simultaneously with the number of the sequences that were classified at all. The length of  $k$ -mers, for which the classification results are the best, is not constant and depends on the set of reads. For *CARMA* and *reduced FACS* it is 21, *original FACS* obtained the best score for  $k = 24$ , while for *PhyloPythia* and *MetaPhyler* the optimal  $k$  is 27. However, the differences between the results are not large in the range of  $k \in [21, 27]$  for all sets. With the increase of the  $k$ -mer length, also the size of the database grows, therefore more memory is needed.

The *PhyloPythia 961 bp* set was classified to the genus rank. However, the classification began from the phylum rank, and then the reads were classified to the class, order, family, and ended up to the genus rank. Accumulation of time, during the classification to a lower rank is shown in Figure 4. As expected with a classification to a lower rank, the number of classified sequences decreased (NC increased), what can be noted in Figure 3, as well as the value of sensitivity and precision decreased (see Figures 1 and 2). The biggest change in sensitivity and precision are noticeable for  $k$ -mers shorter than 18 nucleotides, for longer ones the quality of classification did not much decrease, which is due to lower error probability assignment to the rank.

Table 1. Classification results for the original FACS simHC metagenomic data set (100 000 reads, 269 bp) obtained using CoMeta *allDb*

| $k$       | TP           | FP         | NC          | Sensitivity [%] | Precision [%] | Classified [%] | $t_{com}$ [hh:mm:ss] | $t_{clas}$ [hh:mm:ss] | $t_{all}$ [hh:mm:ss] | Memory [MB] |
|-----------|--------------|------------|-------------|-----------------|---------------|----------------|----------------------|-----------------------|----------------------|-------------|
| 15        | 82241        | 12263      | 6346        | 81.55           | 87.02         | 93.65          | 00:28:36             | 00:00:26              | 00:29:02             | 5497        |
|           | 82241        | 12263      | 6346        | 81.55           | 87.02         | 93.65          | 00:28:36             | 00:01:18              | 00:29:54             | 5497        |
| 18        | 90098        | 3684       | 6346        | 89.98           | 96.07         | 93.65          | 01:16:19             | 00:00:09              | 01:16:28             | 50479       |
|           | 90098        | 3684       | 6346        | 89.98           | 96.07         | 93.65          | 01:16:19             | 00:01:06              | 01:17:25             | 50479       |
| 21        | 93532        | 242        | 6352        | 93.41           | 99.74         | 93.65          | 00:35:04             | 00:00:06              | 00:35:10             | 68103       |
|           | 93532        | 242        | 6352        | 93.41           | 99.74         | 93.65          | 00:35:04             | 00:01:11              | 00:36:15             | 68103       |
| <b>24</b> | 93554        | 215        | 6406        | 93.39           | 99.77         | 93.59          | 00:40:04             | 00:00:05              | 00:40:09             | 71260       |
|           | <b>93570</b> | <b>215</b> | <b>6390</b> | <b>93.41</b>    | <b>99.77</b>  | <b>93.61</b>   | 00:40:04             | 00:00:52              | 00:40:56             | 71260       |
| 27        | 93306        | 217        | 6659        | 93.14           | 99.77         | 93.34          | 00:34:55             | 00:00:06              | 00:35:01             | 72175       |
|           | 93380        | 227        | 6585        | 93.20           | 99.76         | 93.42          | 00:34:55             | 00:00:49              | 00:35:44             | 72175       |
| 30        | 92547        | 221        | 7413        | 92.38           | 99.76         | 92.59          | 00:23:55             | 00:00:06              | 00:24:01             | 75528       |
|           | 92770        | 232        | 7190        | 92.59           | 99.75         | 92.81          | 00:23:55             | 00:00:46              | 00:24:41             | 75528       |

The first row is for the classification without taking into account the *mismatch* file, the second row takes it into account.  $t_{com}$  – time of comparing all the reads with all the groups;  $t_{clas}$  – time of classifying the reads to the best group. Bold values indicate the best score.

Table 2. Classification results for the reduced FACS simHC metagenomic data set (93 653 reads, 269 bp) obtained using CoMeta *allDb*

| $k$ | TP           | FP         | NC       | Sensitivity [%] | Precision [%] | Classified [%] | $t_{com}$ [hh:mm:ss] | $t_{clas}$ [hh:mm:ss] | $t_{all}$ [hh:mm:ss] | Memory [MB] |
|-----|--------------|------------|----------|-----------------|---------------|----------------|----------------------|-----------------------|----------------------|-------------|
| 15  | 82240        | 12263      | 0        | 87.02           | 87.02         | 100.00         | 00:29:35             | 00:00:23              | 00:29:58             | 6769        |
|     | 82240        | 12263      | 0        | 87.02           | 87.02         | 100.00         | 00:29:35             | 00:01:25              | 00:31:00             | 6769        |
| 18  | 90097        | 3684       | 0        | 96.07           | 96.07         | 100.00         | 00:40:56             | 00:00:08              | 00:41:04             | 49056       |
|     | 90097        | 3684       | 0        | 96.07           | 96.07         | 100.00         | 00:40:56             | 00:01:32              | 00:42:28             | 49056       |
| 21  | 93531        | 242        | 6        | 99.74           | 99.74         | 99.99          | 00:44:30             | 00:00:05              | 00:44:35             | 68097       |
|     | <b>93531</b> | <b>242</b> | <b>6</b> | <b>99.74</b>    | <b>99.74</b>  | <b>99.99</b>   | 00:44:30             | 00:00:58              | 00:45:28             | 68097       |
| 24  | 93553        | 215        | 60       | 99.71           | 99.77         | 99.94          | 01:14:29             | 00:00:04              | 01:14:33             | 71903       |
|     | 93569        | 215        | 44       | 99.72           | 99.77         | 99.95          | 01:14:29             | 00:00:54              | 01:15:23             | 71903       |
| 27  | 93305        | 217        | 313      | 99.44           | 99.77         | 99.67          | 01:21:37             | 00:00:03              | 01:21:40             | 73802       |
|     | 93379        | 227        | 239      | 99.50           | 99.76         | 99.74          | 01:21:37             | 00:00:48              | 01:22:25             | 73802       |
| 30  | 92546        | 221        | 1067     | 98.63           | 99.76         | 98.86          | 01:49:36             | 00:00:04              | 01:49:40             | 76328       |
|     | 92769        | 232        | 844      | 98.85           | 99.75         | 99.10          | 01:49:36             | 00:00:43              | 01:50:19             | 76328       |

The first row is for the classification without taking into account the *mismatch* file, the second row takes it into account.  $t_{com}$  – time of comparing all the reads with all the groups;  $t_{clas}$  – time of classifying the reads to the best group. Bold values indicate the best score.

Table 3. Classification results for the MetaPhyler simulated metagenomic data set (66 841 reads, 300 bp) obtained using CoMeta *allDb*

| $k$       | TP           | FP         | NC       | Sensitivity [%] | Precision [%] | Classified [%] | $t_{com}$ [hh:mm:ss] | $t_{clas}$ [hh:mm:ss] | $t_{all}$ [hh:mm:ss] | Memory [MB] |
|-----------|--------------|------------|----------|-----------------|---------------|----------------|----------------------|-----------------------|----------------------|-------------|
| 15        | 50999        | 15873      | 0        | 76.26           | 76.26         | 100            | 00:38:19             | 00:00:11              | 00:38:30             | 5508        |
|           | 50999        | 15873      | 0        | 76.26           | 76.26         | 100            | 00:38:19             | 00:00:20              | 00:38:39             | 5508        |
| 18        | 59775        | 7097       | 0        | 89.39           | 89.39         | 100            | 00:59:03             | 00:00:03              | 00:59:06             | 48363       |
|           | 59775        | 7097       | 0        | 89.39           | 89.39         | 100            | 00:59:03             | 00:00:12              | 00:59:15             | 48363       |
| 21        | 66521        | 353        | 0        | 99.47           | 99.47         | 100            | 00:50:23             | 00:00:02              | 00:50:25             | 67342       |
|           | 66521        | 353        | 0        | 99.47           | 99.47         | 100            | 00:50:23             | 00:00:11              | 00:50:34             | 67342       |
| 24        | 66625        | 247        | 0        | 99.63           | 99.63         | 100            | 00:13:16             | 00:00:02              | 00:13:18             | 70743       |
|           | 66625        | 247        | 0        | 99.63           | 99.63         | 100            | 00:13:16             | 00:00:10              | 00:13:26             | 70743       |
| <b>27</b> | 66634        | 240        | 0        | 99.64           | 99.64         | 100            | 00:34:42             | 00:00:02              | 00:34:44             | 73018       |
|           | <b>66634</b> | <b>240</b> | <b>0</b> | <b>99.64</b>    | <b>99.64</b>  | <b>100</b>     | 00:34:42             | 00:00:11              | 00:34:53             | 73018       |
| 30        | 66628        | 246        | 0        | 99.63           | 99.63         | 100            | 01:06:37             | 00:00:02              | 01:06:39             | 75794       |
|           | 66628        | 246        | 0        | 99.63           | 99.63         | 100            | 01:06:37             | 00:00:09              | 01:06:46             | 75794       |

The first row is for the classification without taking into account the *mismatch* file, the second row takes it into account.  $t_{com}$  – time of comparing all the reads with all the groups;  $t_{clas}$  – time of classifying the reads to the best group. Bold values indicate the best score.

Table 4. Classification results for the CARMA 454 simulated metagenomic data set (25 000 reads, 265 bp) obtained using CoMeta *allDb*

| $k$       | TP           | FP         | NC       | Sensitivity<br>[%] | Precision<br>[%] | Classified<br>[%] | $t_{com}$<br>[hh:mm:ss] | $t_{clas}$<br>[hh:mm:ss] | $t_{all}$<br>[hh:mm:ss] | Memory<br>[MB] |
|-----------|--------------|------------|----------|--------------------|------------------|-------------------|-------------------------|--------------------------|-------------------------|----------------|
| 15        | 15454        | 10148      | 0        | 60.36              | 60.36            | 100.00            | 00:10:09                | 00:00:08                 | 00:10:17                | 5182           |
|           | 15454        | 10148      | 0        | 60.36              | 60.36            | 100.00            | 00:10:09                | 00:00:16                 | 00:10:25                | 5182           |
| 18        | 22122        | 2965       | 0        | 88.18              | 88.18            | 100.00            | 00:28:28                | 00:00:02                 | 00:28:30                | 49203          |
|           | 22122        | 2965       | 0        | 88.18              | 88.18            | 100.00            | 00:28:28                | 00:00:19                 | 00:28:47                | 49203          |
| <b>21</b> | 24951        | 203        | 2        | 99.19              | 99.19            | 99.99             | 00:24:29                | 00:00:01                 | 00:24:30                | 66243          |
|           | <b>24952</b> | <b>203</b> | <b>1</b> | <b>99.19</b>       | <b>99.19</b>     | <b>100.00</b>     | 00:24:29                | 00:00:12                 | 00:24:41                | 66243          |
| 24        | 24950        | 218        | 20       | 99.06              | 99.13            | 99.92             | 00:27:47                | 00:00:02                 | 00:27:49                | 71313          |
|           | 24955        | 218        | 15       | 99.07              | 99.13            | 99.94             | 00:27:47                | 00:00:12                 | 00:27:59                | 71313          |
| 27        | 24869        | 215        | 106      | 98.73              | 99.14            | 99.58             | 00:17:03                | 00:00:01                 | 00:17:04                | 69175          |
|           | 24886        | 215        | 89       | 98.79              | 99.14            | 99.64             | 00:17:03                | 00:00:11                 | 00:17:14                | 69175          |
| 30        | 24667        | 213        | 307      | 97.94              | 99.14            | 98.77             | 00:17:49                | 00:00:01                 | 00:17:50                | 75913          |
|           | 24736        | 215        | 237      | 98.21              | 99.14            | 99.05             | 00:17:49                | 00:00:12                 | 00:18:01                | 75913          |

The first row is for the classification without taking into account the *mismatch* file, the second row takes it into account.  $t_{com}$  – time of comparing all the reads with all the groups;  $t_{clas}$  – time of classifying the reads to the best group. Bold values indicate the best score.

Table 5. Classification results for the PhyloPythia 961 simulated metagenomic data set (114457 reads, 961 bp) obtained using CoMeta *allDb*

| $k$ | TP            | FP         | NC          | Sensitivity [%] | Precision [%] | Classified [%] | $t_{com}$ [hh:mm:ss] | $t_{clas}$ [hh:mm:ss] | $t_{all}$ [hh:mm:ss] | Memory [MB] |
|-----|---------------|------------|-------------|-----------------|---------------|----------------|----------------------|-----------------------|----------------------|-------------|
| 15  | 64614         | 48654      | 1189        | 56.45           | 57.05         | 98.96          | 00:13:10             | 00:04:57              | 00:18:07             | 4659        |
|     | 64661         | 49077      | 719         | 56.49           | 56.85         | 99.37          | 00:13:10             | 00:05:01              | 00:18:11             | 4659        |
| 18  | 88632         | 15152      | 10673       | 77.44           | 85.40         | 90.68          | 01:20:12             | 00:05:00              | 01:25:12             | 19000       |
|     | 88964         | 22349      | 3144        | 77.73           | 79.92         | 97.25          | 01:20:12             | 00:04:47              | 01:24:59             | 19000       |
| 21  | 106743        | 521        | 7193        | 93.26           | 99.51         | 93.72          | 01:20:42             | 00:04:11              | 01:24:53             | 20269       |
|     | 107538        | 1685       | 5234        | 93.95           | 98.46         | 95.43          | 01:20:42             | 00:04:49              | 01:25:31             | 20269       |
| 24  | 106739        | 405        | 7313        | 93.26           | 99.62         | 93.61          | 00:51:33             | 00:03:38              | 00:55:11             | 23026       |
|     | 107671        | 734        | 6052        | 94.07           | 99.32         | 94.71          | 00:51:33             | 00:03:45              | 00:55:18             | 23026       |
| 27  | 106635        | 351        | 7471        | 93.17           | 99.67         | 93.47          | 00:47:02             | 00:03:31              | 00:50:33             | 20790       |
|     | <b>107665</b> | <b>552</b> | <b>6240</b> | <b>94.07</b>    | <b>99.49</b>  | <b>94.55</b>   | 00:47:02             | 00:03:34              | 00:50:36             | 20790       |
| 30  | 106533        | 302        | 7622        | 93.08           | 99.72         | 93.34          | 00:33:18             | 00:04:28              | 00:37:46             | 20330       |
|     | 107613        | 460        | 6384        | 94.02           | 99.57         | 94.42          | 00:33:18             | 00:04:34              | 00:37:52             | 20330       |

The first row is for the classification without taking into account the *mismatch* file, the second row takes it into account.  $t_{com}$  – time of comparing all the reads with all the groups;  $t_{clas}$  – time of classifying the reads to the best group. Bold values indicate the best score.

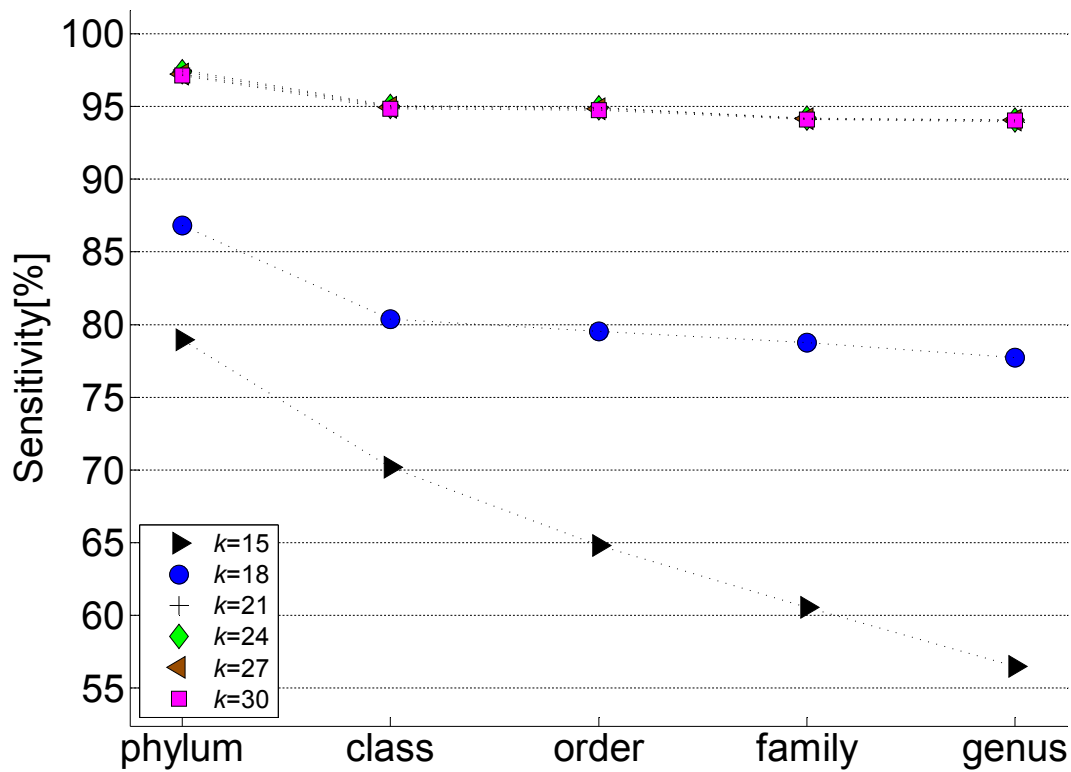

Figure 1. The classification sensitivity obtained for the *PhyloPythia 961 bp* data set using CoMeta *allDb*. The graph shows how the sensitivity varies with the classification to subsequent branches in the taxonomic tree for different lengths of  $k$ -mer ( $k$ ).

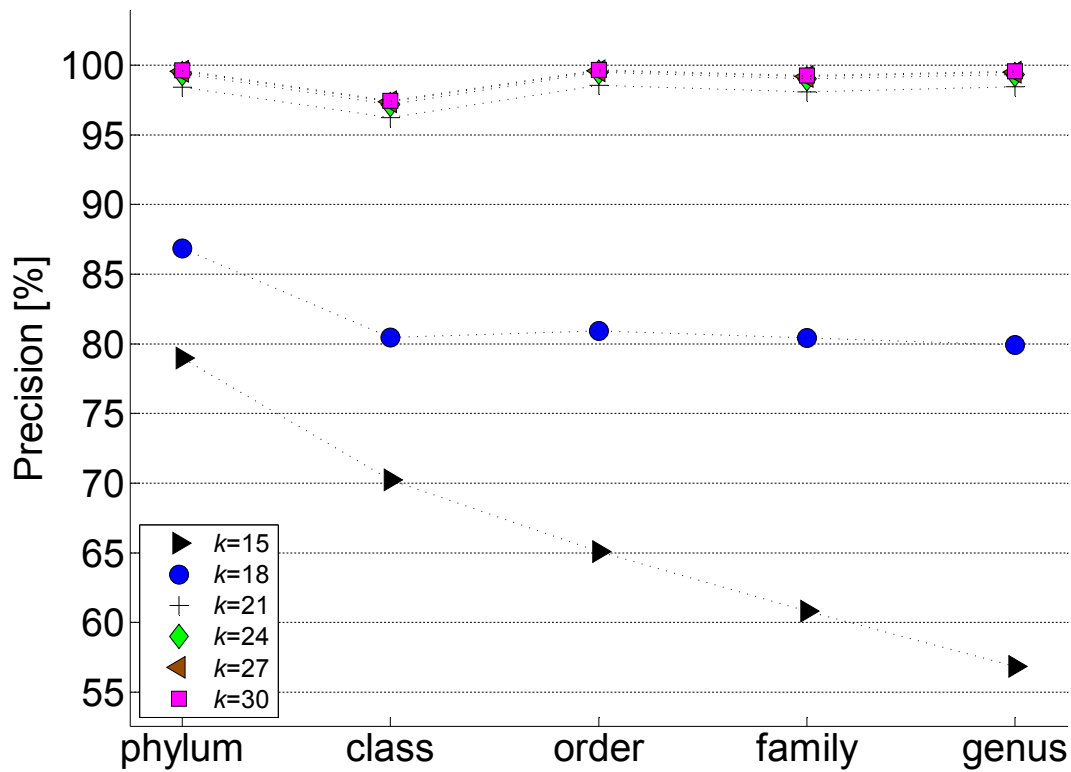

Figure 2. The classification precision obtained for the *PhyloPythia 961 bp* data set using CoMeta *allDb*. The graph shows how the precision varies with the classification to subsequent branches in the taxonomic tree for different lengths of  $k$ -mer ( $k$ ).



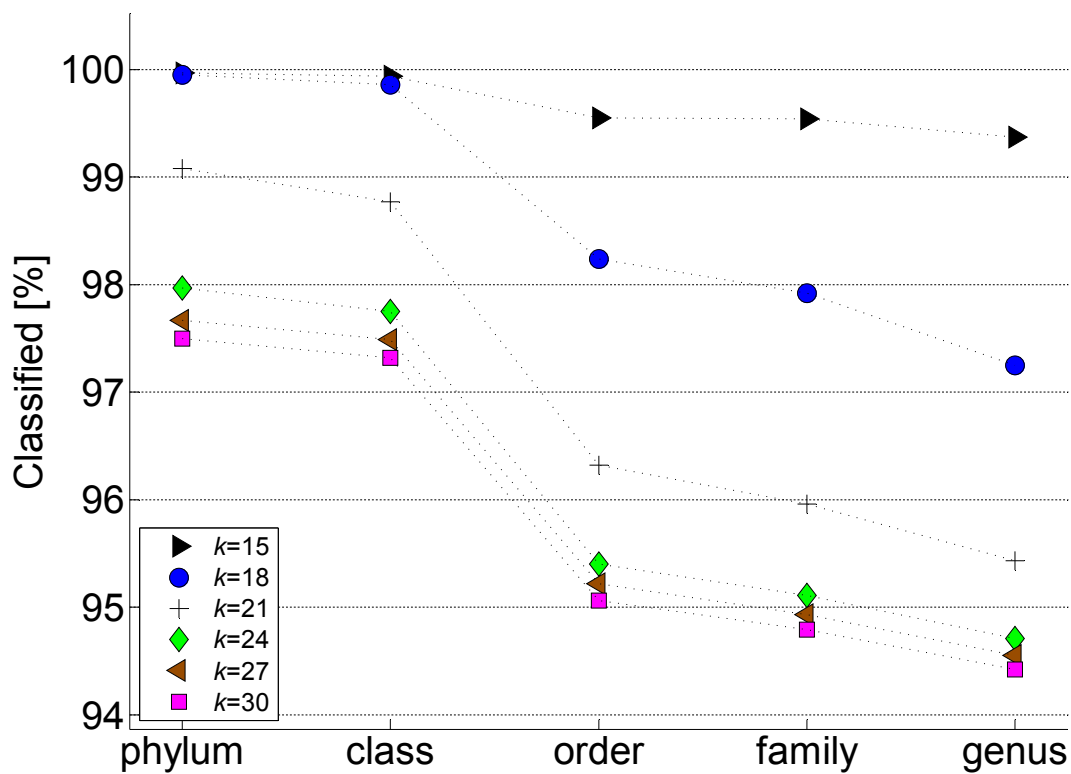

Figure 3. The number of classified reads obtained for the *PhyloPythia 961 bp* data set using CoMeta *allDb*. The graph shows how the percentage of classified reads varies with the classification to subsequent branches in the taxonomic tree for different lengths of *k*-mer (*k*).

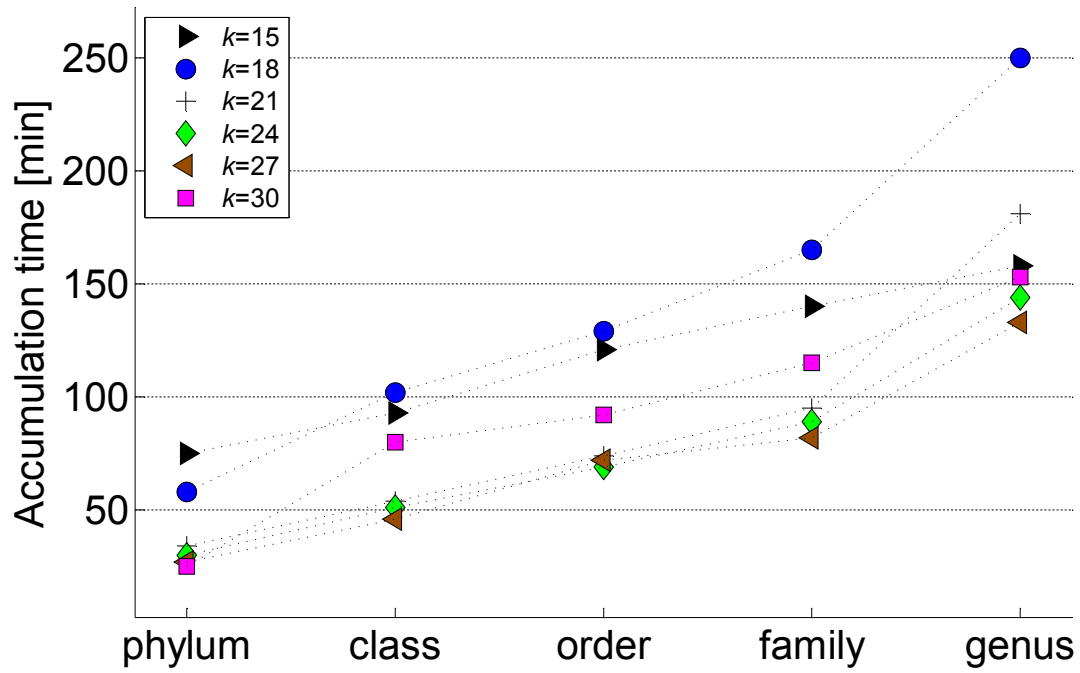

Figure 4. Accumulated processing times obtained for the *PhyloPythia* 961 bp data set using CoMeta *allDb*.

## 1.2 LMAT

We examined the LMAT algorithm to select the best parameters to compare this program with CoMeta. We checked the classification results for the two databases built by the LMAT authors (*Db*: *kML* and *kFull*), as well as using two values of the “minimum score” (*ms*: 0 and 1)—LMAT parameter, which is responsible for distantly related between read and reference group (when read is assigned to the taxonomic label). The classification results (see Table 6) show that for  $ms = 0$ , the number of all classified sequences is highest, unfortunately, besides the number of correctly classified, also the number of incorrectly classified increases. The size difference in the number of classified reads is not constant, it depends on which *k*-mer database and set of reads was used. We expected that for larger database, more reads should be correctly classified, but this was not observed for the *PhyloPythia 961 bp* set. For this set of reads, the classification results obtained using the *kML* database were better. Probably because of the fact that this set was classified to a lower level (genus), where *k*-mer frequently appearing are more significant, and *kML* is the marker database that contains only *k*-mers repeated not less than 1000 times. The *FACS* set contains human chromosome reads and *kML* database does not contain *k*-mers derived from chordates, while *kFull* already contains them. Therefore, we also showed the classification results when reads of chordates are not taken into account using *kML* database (annotation: <sup>a</sup>).

**Table 6. Classification results obtained using LMAT**

| Db                                                                     | <i>ms</i> | TP            | FP          | NC                        | Sensitivity [%]            | Precision [%] | Classified [%]             | $t_{clas}$ [hh:mm:ss] | $t_{an}$ [hh:mm:ss] | $t_{all}$ [hh:mm:ss] |
|------------------------------------------------------------------------|-----------|---------------|-------------|---------------------------|----------------------------|---------------|----------------------------|-----------------------|---------------------|----------------------|
| CARMA 454 simulated metagenomic data set (25 000 sequences, 265 bp)    |           |               |             |                           |                            |               |                            |                       |                     |                      |
| kML                                                                    | 0         | 20108         | 10          | 4882                      | 80.43                      | 99.95         | 80.47                      | 00:40:21              | 00:02:34            | 00:42:55             |
|                                                                        | 1         | 13209         | 9           | 11782                     | 52.84                      | 99.93         | 52.87                      | 00:40:21              | 00:05:26            | 00:45:47             |
| <b>kFull</b>                                                           | <b>0</b>  | <b>21501</b>  | <b>9</b>    | <b>3490</b>               | <b>86.00</b>               | <b>99.96</b>  | <b>86.04</b>               | 00:34:49              | 00:02:44            | 00:37:33             |
|                                                                        | 1         | 17            | 0           | 24983                     | 0.07                       | 100.00        | 0.07                       | 00:34:49              | 00:02:11            | 00:37:00             |
| MetaPhyler simulated metagenomic data set (66 841 sequences, 300 bp)   |           |               |             |                           |                            |               |                            |                       |                     |                      |
| kML                                                                    | 0         | 63987         | 1462        | 1392                      | 95.73                      | 97.77         | 96.50                      | 00:57:21              | 00:00:48            | 00:58:09             |
|                                                                        | 1         | 51331         | 1367        | 14143                     | 76.80                      | 97.41         | 78.84                      | 00:57:21              | 00:17:25            | 01:14:46             |
| <b>kFull</b>                                                           | <b>0</b>  | <b>65859</b>  | <b>1473</b> | <b>458</b>                | <b>98.53</b>               | <b>97.81</b>  | <b>99.31</b>               | 03:14:41              | 00:18:22            | 03:33:03             |
|                                                                        | 1         | 61610         | 1415        | 3816                      | 92.17                      | 97.75         | 94.29                      | 03:14:41              | 00:49:22            | 04:04:03             |
| Reduced FACS simHC metagenomic data set (93 653 sequences, 269 bp)     |           |               |             |                           |                            |               |                            |                       |                     |                      |
|                                                                        | 0         | 24653         | 30          | 68970(2366 <sup>a</sup> ) | 26.32(91.14 <sup>a</sup> ) | 99.88         | 26.36(91.25 <sup>a</sup> ) | 00:59:20              | 00:00:48            | 01:00:08             |
| kML                                                                    | 1         | 17866         | 27          | 75760(9156 <sup>a</sup> ) | 19.08(66.05 <sup>a</sup> ) | 99.85         | 19.11(66.15 <sup>a</sup> ) | 00:59:20              | 00:04:08            | 01:03:28             |
| <b>kFull</b>                                                           | <b>0</b>  | <b>92478</b>  | <b>16</b>   | <b>1159</b>               | <b>98.75</b>               | <b>99.98</b>  | <b>98.76</b>               | 01:28:19              | 00:04:46            | 01:33:05             |
|                                                                        | 1         | 38            | 0           | 93615                     | 0.04                       | 100.00        | 0.04                       | 01:28:19              | 00:02:58            | 01:31:17             |
| PhyloPythia simulated metagenomic data set (114 457 sequences, 961 bp) |           |               |             |                           |                            |               |                            |                       |                     |                      |
| <b>kML</b>                                                             | <b>0</b>  | <b>112281</b> | <b>208</b>  | <b>1968</b>               | <b>98.10</b>               | <b>99.82</b>  | <b>98.28</b>               | 05:36:33              | 00:11:29            | 05:48:02             |
|                                                                        | 1         | 110844        | 191         | 3422                      | 96.84                      | 99.83         | 97.01                      | 05:36:33              | 00:14:10            | 05:50:43             |
| kFull                                                                  | 0         | 94451         | 193         | 19813                     | 82.52                      | 99.80         | 82.69                      | 09:38:57              | 02:23:56            | 12:02:53             |
|                                                                        | 1         | 1735          | 3           | 112719                    | 1.52                       | 99.83         | 1.52                       | 09:38:57              | 00:50:23            | 10:29:20             |

<sup>a</sup> – classification results obtained if the reads derived from a human chromosome are not taken into account.

*Db* – database used for classification.

*ms* – value of minimum score in LMAT algorithm when assigning a taxonomic label to the read.

Bold values indicate the best score.

## 2 Database building

The  $k$ -mer databases consist of all reference sequences downloaded from the NCBI website. The overall sizes of the databases for classification at the phylum rank are presented in the main paper. Sizes for each non-compact database, that are loaded during the “Comparison” step, are provided in Tables 7 to 9. The largest set of  $k$ -mers is for the “Chordata” phylum (up to 73 GB for  $k = 30$ ). For bacteria, the Proteobacteria  $k$ -mer database is the largest one, and we need almost 20 GB of RAM memory for comparison with this set.

Figure 5 shows the dependence of the database size on the number of distinct  $k$ -mers (which appeared at least once in the  $gi$  group).

**Table 7.  $k$ -mer non-compact database size (part 1/3)**

| Phylum                   | $k = 15$ | $k = 18$ | $k = 21$ | $k = 24$ | $k = 27$ | $k = 30$ |
|--------------------------|----------|----------|----------|----------|----------|----------|
| Archaea                  |          |          |          |          |          |          |
| Crenarchaeota            | 492M     | 538M     | 545M     | 550M     | 554M     | 558M     |
| Euryarchaeota            | 1.2G     | 1.5G     | 1.6G     | 1.6G     | 1.6G     | 1.6G     |
| Korarchaeota             | 13M      | 13M      | 13M      | 13M      | 13M      | 13M      |
| Nanoarchaeota            | 4.4M     | 4.4M     | 4.4M     | 4.4M     | 4.5M     | 4.5M     |
| Thaumarchaeota           | 82M      | 85M      | 87M      | 88M      | 89M      | 90M      |
| undef                    | 87M      | 97M      | 104M     | 112M     | 119M     | 125M     |
| Bacteria                 |          |          |          |          |          |          |
| Acidobacteria            | 328M     | 358M     | 361M     | 363M     | 365M     | 367M     |
| Actinobacteria           | 1.9G     | 4.5G     | 5.2G     | 5.4G     | 5.4G     | 5.5G     |
| Aquificae                | 112M     | 117M     | 118M     | 118M     | 119M     | 119M     |
| Armatimonadetes          | 1.1M     | 1.2M     | 1.2M     | 1.3M     | 1.3M     | 1.4M     |
| Bacteroidetes            | 1.7G     | 2.3G     | 2.3G     | 2.3G     | 2.3G     | 2.3G     |
| Caldiserica              | 13M      | 13M      | 13M      | 13M      | 13M      | 13M      |
| candidate division EM 3  | 528K     | 528K     | 528K     | 528K     | 528K     | 528K     |
| candidate division WPS-1 | 536K     | 536K     | 536K     | 536K     | 536K     | 536K     |
| candidate division WPS-2 | 540K     | 540K     | 540K     | 540K     | 540K     | 540K     |
| candidate division ZB3   | 540K     | 540K     | 540K     | 540K     | 544K     | 544K     |
| Chlamydiae               | 158M     | 166M     | 168M     | 169M     | 171M     | 172M     |
| Chlorobi                 | 206M     | 215M     | 217M     | 218M     | 218M     | 219M     |
| Chloroflexi              | 353M     | 384M     | 389M     | 393M     | 395M     | 398M     |
| Chrysiogenetes           | 23M      | 23M      | 23M      | 23M      | 23M      | 23M      |
| Cyanobacteria            | 954M     | 1.2G     | 1.2G     | 1.2G     | 1.2G     | 1.2G     |
| Deferribacteres          | 76M      | 79M      | 79M      | 79M      | 79M      | 79M      |
| Deinococcus-Thermus      | 278M     | 341M     | 349M     | 352M     | 354M     | 356M     |
| Dictyoglomi              | 29M      | 29M      | 30M      | 30M      | 30M      | 30M      |
| Elusimicrobia            | 22M      | 23M      | 23M      | 23M      | 23M      | 23M      |
| Fibrobacteres            | 31M      | 31M      | 31M      | 31M      | 31M      | 31M      |
| Firmicutes               | 3.3G     | 6.0G     | 6.3G     | 6.4G     | 6.5G     | 6.6G     |
| Fusobacteria             | 96M      | 107M     | 108M     | 108M     | 108M     | 109M     |
| Gemmatimonadetes         | 38M      | 39M      | 39M      | 39M      | 40M      | 40M      |
| Ignavibacteria           | 52M      | 53M      | 54M      | 54M      | 54M      | 54M      |
| Lentisphaerae            | 972K     | 1.1M     | 1.1M     | 1.1M     | 1.2M     | 1.2M     |
| Nitrospirae              | 73M      | 74M      | 74M      | 75M      | 75M      | 75M      |
| Planctomycetes           | 286M     | 305M     | 308M     | 310M     | 312M     | 313M     |
| Poribacteria             | 892K     | 904K     | 916K     | 928K     | 940K     | 948K     |
| Proteobacteria           | 5.3G     | 16G      | 18G      | 19G      | 19G      | 19G      |
| Spirochaetes             | 564M     | 653M     | 667M     | 675M     | 682M     | 687M     |
| Synergistetes            | 79M      | 80M      | 81M      | 81M      | 81M      | 82M      |
| Tenericutes              | 218M     | 276M     | 287M     | 291M     | 295M     | 299M     |
| Thermodesulfobacteria    | 30M      | 31M      | 31M      | 31M      | 31M      | 31M      |
| Thermotogae              | 202M     | 217M     | 218M     | 220M     | 220M     | 221M     |
| undef                    | 611M     | 765M     | 878M     | 983M     | 1.1G     | 1.2G     |
| Verrucomicrobia          | 116M     | 120M     | 121M     | 122M     | 122M     | 123M     |

**Table 8.  $k$ -mer non-compact database size (part 2/3)**

| Phylum                | $k = 15$ | $k = 18$ | $k = 21$ | $k = 24$ | $k = 27$ | $k = 30$ |
|-----------------------|----------|----------|----------|----------|----------|----------|
| Eukaryota             |          |          |          |          |          |          |
| Acanthocephala        | 2.1M     | 2.2M     | 2.3M     | 2.4M     | 2.4M     | 2.5M     |
| Annelida              | 55M      | 60M      | 63M      | 67M      | 69M      | 71M      |
| Apicomplexa           | 1.2G     | 1.5G     | 1.6G     | 1.6G     | 1.6G     | 1.6G     |
| Arthropoda            | 3.4G     | 5.8G     | 6.2G     | 6.4G     | 6.5G     | 6.7G     |
| Ascomycota            | 4.6G     | 8.9G     | 9.2G     | 9.3G     | 9.4G     | 9.4G     |
| Aurearenophyceae      | 572K     | 572K     | 572K     | 572K     | 572K     | 572K     |
| Bacillariophyta       | 283M     | 296M     | 298M     | 299M     | 299M     | 300M     |
| Basidiomycota         | 1.3G     | 1.5G     | 1.6G     | 1.6G     | 1.6G     | 1.6G     |
| Blastocladiomycota    | 2.4M     | 2.5M     | 2.5M     | 2.6M     | 2.6M     | 2.6M     |
| Bolidophyceae         | 672K     | 676K     | 684K     | 688K     | 692K     | 696K     |
| Brachiopoda           | 2.9M     | 2.9M     | 3.0M     | 3.0M     | 3.1M     | 3.1M     |
| Bryozoa               | 4.9M     | 5.2M     | 5.5M     | 5.7M     | 5.8M     | 5.9M     |
| Chaetognatha          | 2.2M     | 2.2M     | 2.3M     | 2.4M     | 2.4M     | 2.5M     |
| Chlorophyta           | 827M     | 1.1G     | 1.1G     | 1.1G     | 1.2G     | 1.2G     |
| Chordata              | 6.5G     | 50G      | 65G      | 69G      | 71G      | 73G      |
| Chromerida            | 2.6M     | 2.6M     | 2.6M     | 2.6M     | 2.6M     | 2.6M     |
| Chytridiomycota       | 6.4M     | 6.8M     | 7.1M     | 7.3M     | 7.5M     | 7.7M     |
| Cnidaria              | 362M     | 398M     | 404M     | 408M     | 412M     | 415M     |
| Cryptomycota          | 716K     | 724K     | 732K     | 736K     | 740K     | 744K     |
| Ctenophora            | 3.4M     | 3.4M     | 3.4M     | 3.4M     | 3.4M     | 3.4M     |
| Cycliophora           | 596K     | 600K     | 604K     | 604K     | 608K     | 612K     |
| Echinodermata         | 420M     | 461M     | 469M     | 474M     | 478M     | 482M     |
| Entoprocta            | 1.2M     | 1.2M     | 1.2M     | 1.2M     | 1.2M     | 1.2M     |
| Euglenida             | 14M      | 15M      | 16M      | 16M      | 16M      | 17M      |
| Eustigmatophyceae     | 1.2M     | 1.2M     | 1.2M     | 1.3M     | 1.3M     | 1.3M     |
| Gastrotricha          | 1.8M     | 1.9M     | 2.0M     | 2.1M     | 2.1M     | 2.2M     |
| Glomeromycota         | 20M      | 22M      | 23M      | 24M      | 26M      | 27M      |
| Gnathostomulida       | 812K     | 828K     | 844K     | 856K     | 864K     | 876K     |
| Haplosporidia         | 836K     | 860K     | 880K     | 896K     | 912K     | 928K     |
| Hemichordata          | 188M     | 197M     | 198M     | 199M     | 200M     | 200M     |
| Kinorhyncha           | 628K     | 632K     | 636K     | 640K     | 644K     | 648K     |
| Loricifera            | 540K     | 540K     | 540K     | 540K     | 540K     | 540K     |
| Microsporidia         | 112M     | 118M     | 119M     | 120M     | 120M     | 120M     |
| Mollusca              | 174M     | 197M     | 210M     | 221M     | 232M     | 240M     |
| Myzostomida           | 976K     | 1004K    | 1.0M     | 1.1M     | 1.1M     | 1.1M     |
| Nematoda              | 1.2G     | 1.7G     | 1.7G     | 1.8G     | 1.8G     | 1.8G     |
| Nematomorpha          | 748K     | 756K     | 764K     | 772K     | 780K     | 784K     |
| Nemertea              | 4.1M     | 4.5M     | 4.7M     | 5.0M     | 5.2M     | 5.3M     |
| Neocallimastigomycota | 3.7M     | 4.4M     | 5.1M     | 5.8M     | 6.6M     | 7.4M     |
| Onychophora           | 2.5M     | 2.6M     | 2.7M     | 2.8M     | 2.9M     | 2.9M     |
| Orthonectida          | 536K     | 536K     | 540K     | 540K     | 540K     | 540K     |

**Table 9.  $k$ -mer non-compact database size (part 3/3)**

| Phylum           | $k = 15$ | $k = 18$ | $k = 21$ | $k = 24$ | $k = 27$ | $k = 30$ |
|------------------|----------|----------|----------|----------|----------|----------|
| Eukaryota contd. |          |          |          |          |          |          |
| Phaeophyceae     | 14M      | 15M      | 17M      | 18M      | 19M      | 20M      |
| Picobiliphytes   | 568K     | 572K     | 576K     | 576K     | 580K     | 584K     |
| Pinguiphyceae    | 812K     | 824K     | 832K     | 840K     | 848K     | 852K     |
| Placozoa         | 115M     | 119M     | 119M     | 119M     | 119M     | 119M     |
| Platyhelminthes  | 1.2G     | 1.8G     | 1.9G     | 1.9G     | 1.9G     | 2.0G     |
| Porifera         | 131M     | 137M     | 139M     | 141M     | 142M     | 143M     |
| Priapulida       | 1.2M     | 1.2M     | 1.2M     | 1.2M     | 1.2M     | 1.2M     |
| Rhombozoa        | 1.2M     | 1.2M     | 1.2M     | 1.2M     | 1.3M     | 1.3M     |
| Rotifera         | 19M      | 20M      | 21M      | 21M      | 22M      | 22M      |
| Streptophyta     | 5.1G     | 15G      | 17G      | 18G      | 19G      | 19G      |
| Tardigrada       | 2.5M     | 2.7M     | 2.8M     | 2.9M     | 2.9M     | 3.0M     |
| undef            | 2.7G     | 4.3G     | 4.5G     | 4.6G     | 4.7G     | 4.8G     |
| Xanthophyceae    | 3.5M     | 3.6M     | 3.7M     | 3.9M     | 4.0M     | 4.0M     |
| Xenoturbellida   | 896K     | 904K     | 908K     | 912K     | 916K     | 920K     |
| Viroids          |          |          |          |          |          |          |
| undef            | 1.1M     | 1.1M     | 1.2M     | 1.3M     | 1.4M     | 1.4M     |
| Viruses          |          |          |          |          |          |          |
| undef            | 1.1G     | 1.4G     | 1.5G     | 1.6G     | 1.7G     | 1.8G     |



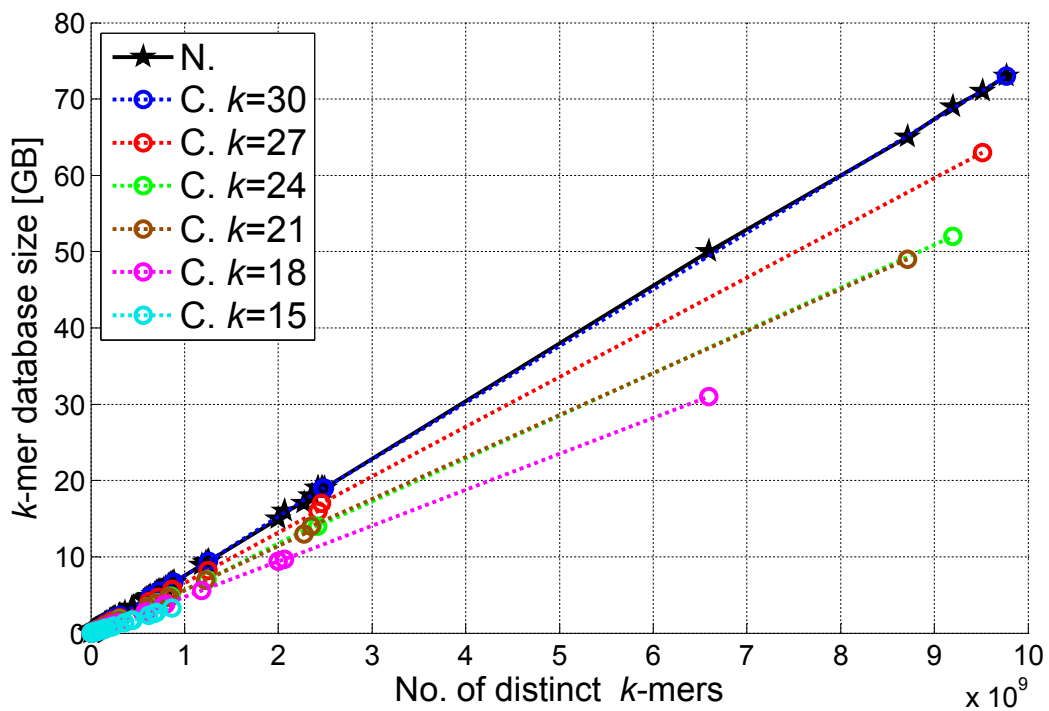

Figure 5. The dependence between the  $k$ -mer database size and the number of distinct  $k$ -mers. The symbol “N” (“star” mark) represents the non-compact database, whose size does not depend on the length of the  $k$ -mers, while the symbol “C” (“circle” mark) represents the compact databases using different lengths of  $k$ -mer.
